# Supplementary material for: ERK1/2-CEBPB Axis-Regulated hBD1 Enhances Anti-Tuberculosis Capacity in Alveolar Type II Epithelial Cells
Source: MDPI journal article supplement (doi:10.3390/ijms25042408), 2024-02-18
Supplement: s1 [file s1]

**Supplementary Figures for  
ERK1/2-CEBPB axis-  
regulated hBD1 enhances  
anti-tuberculosis capacity in  
alveolar type II epithelial  
cells**

S1 Fig.

A

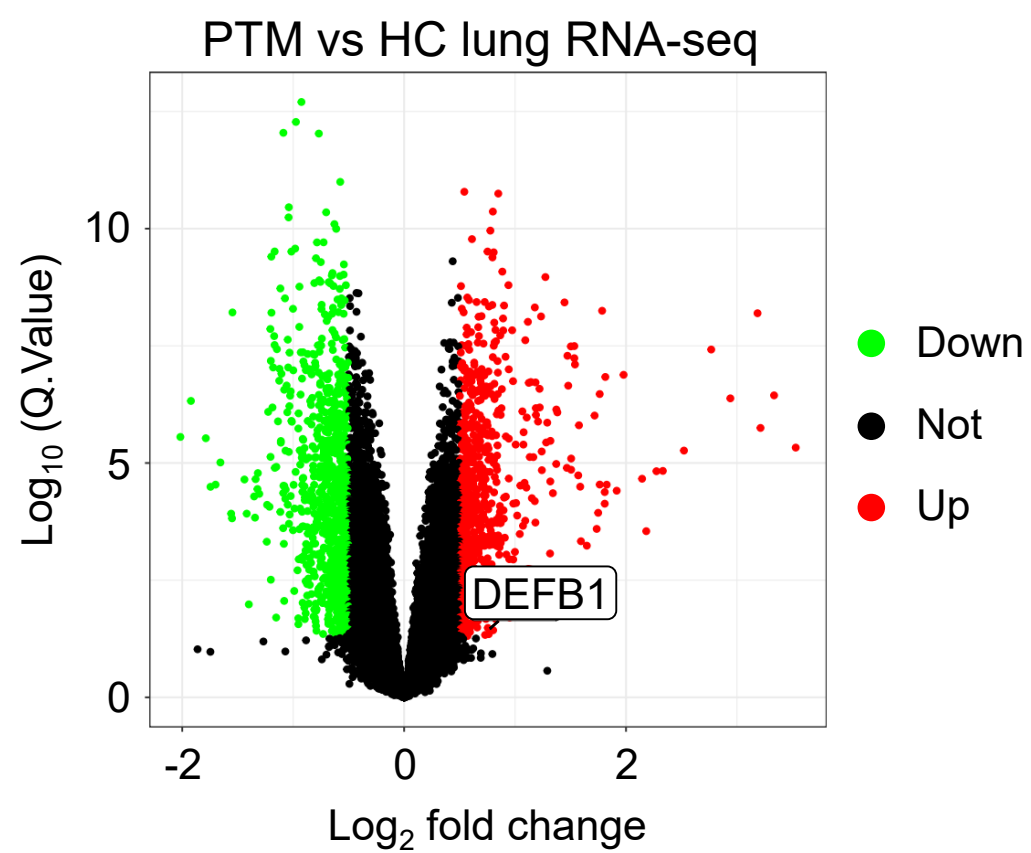

B

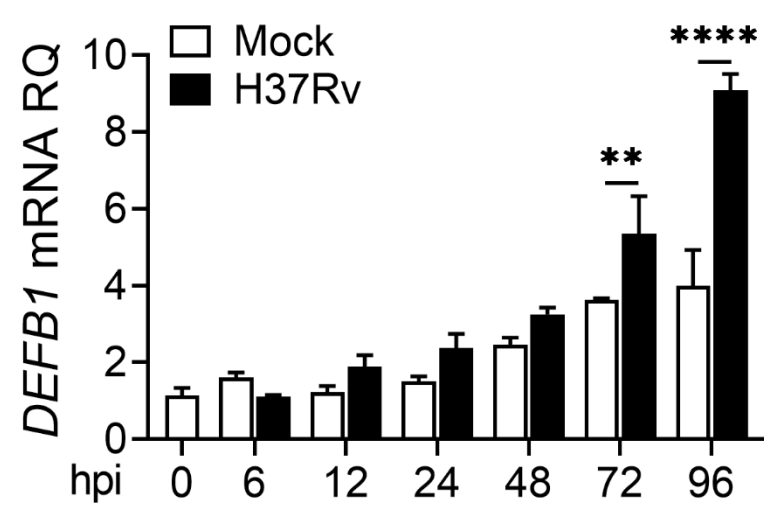

C

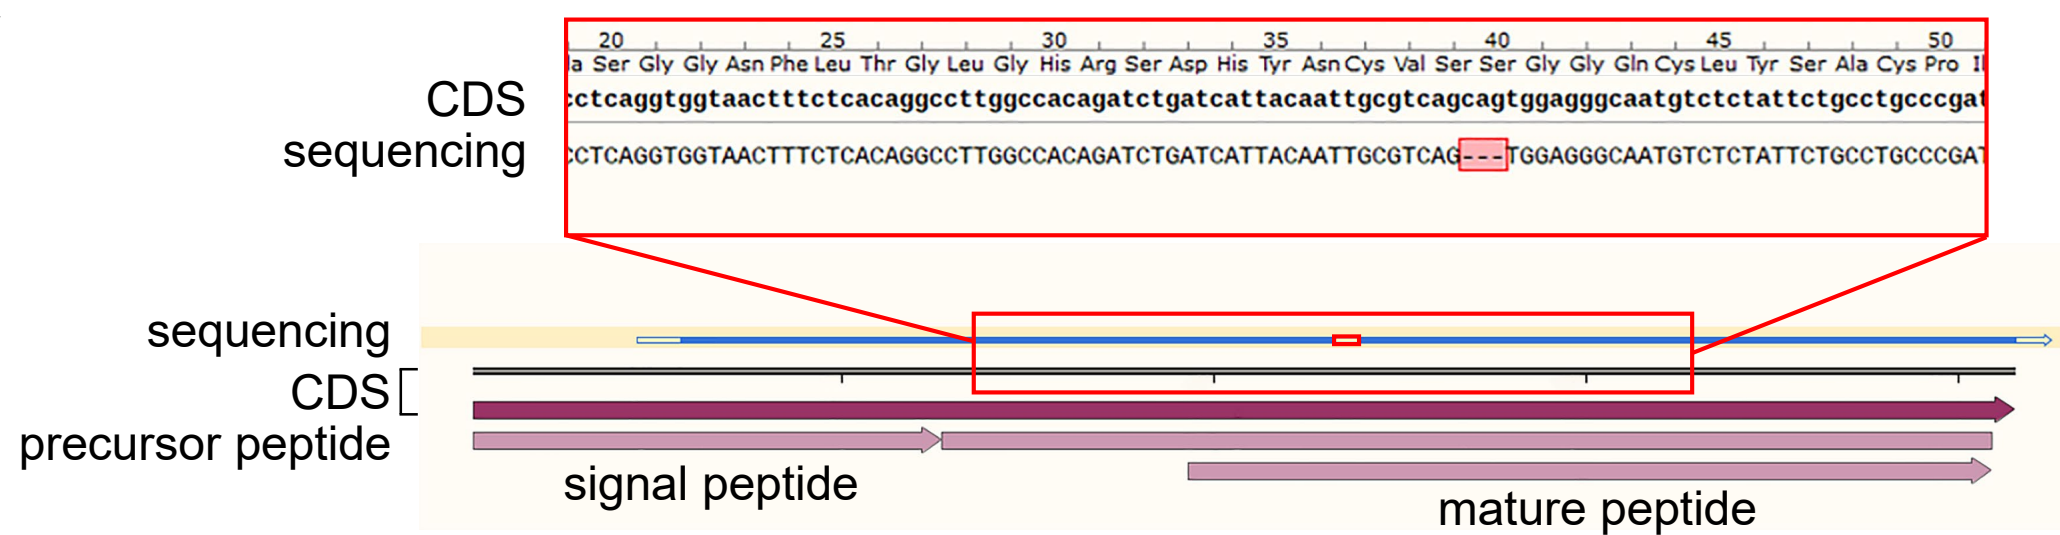

D

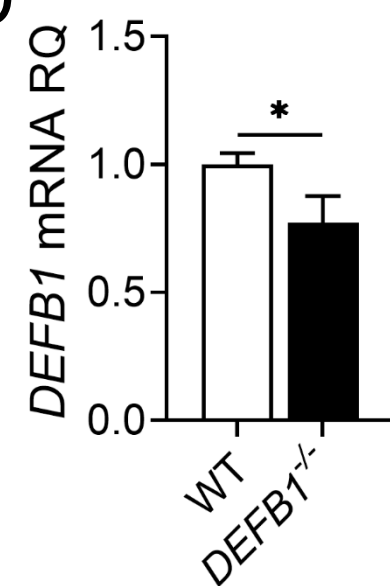

E

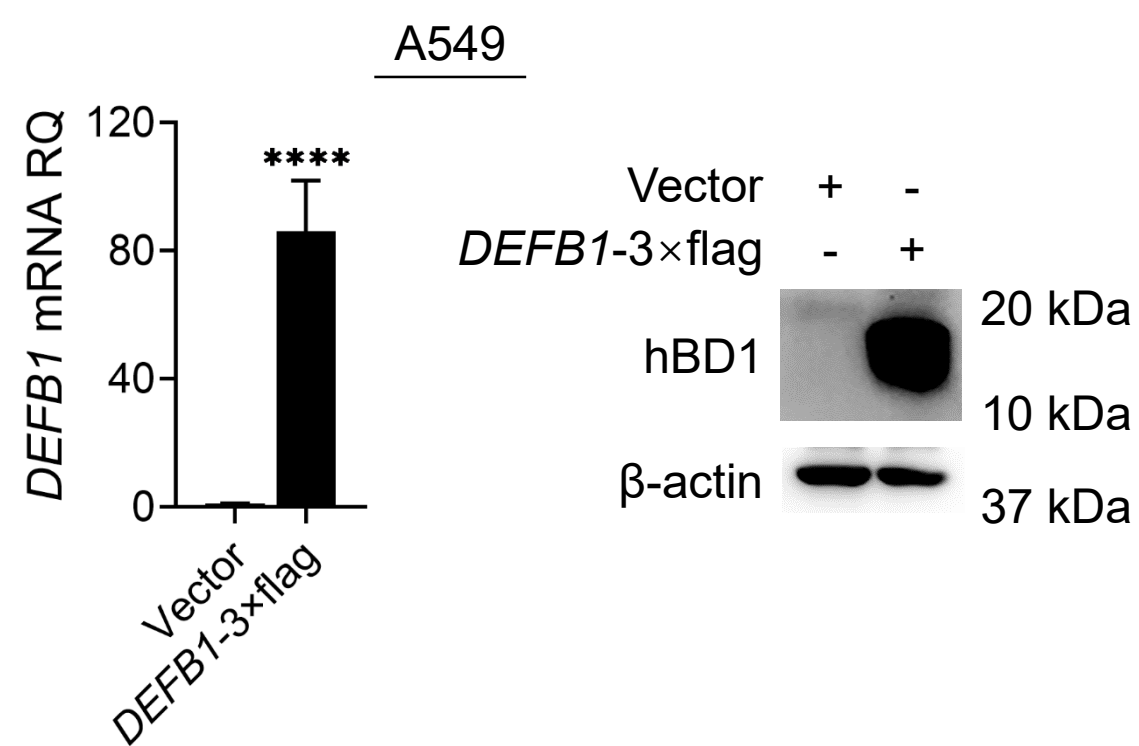

F

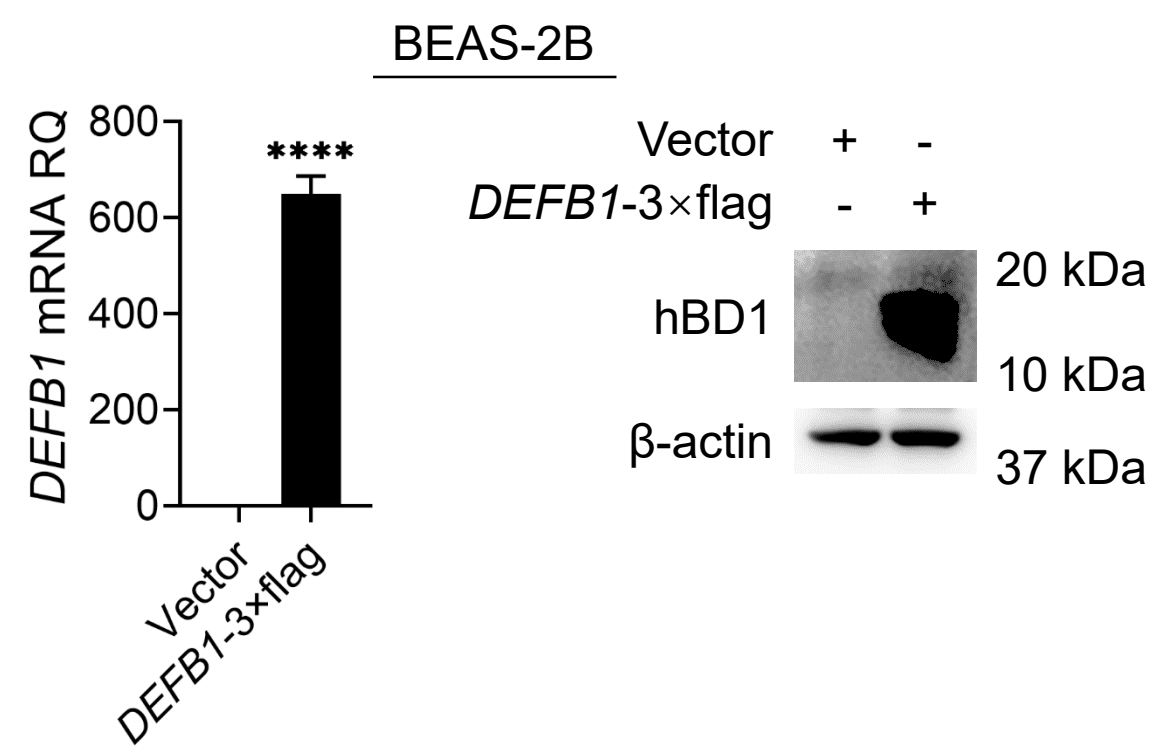

G

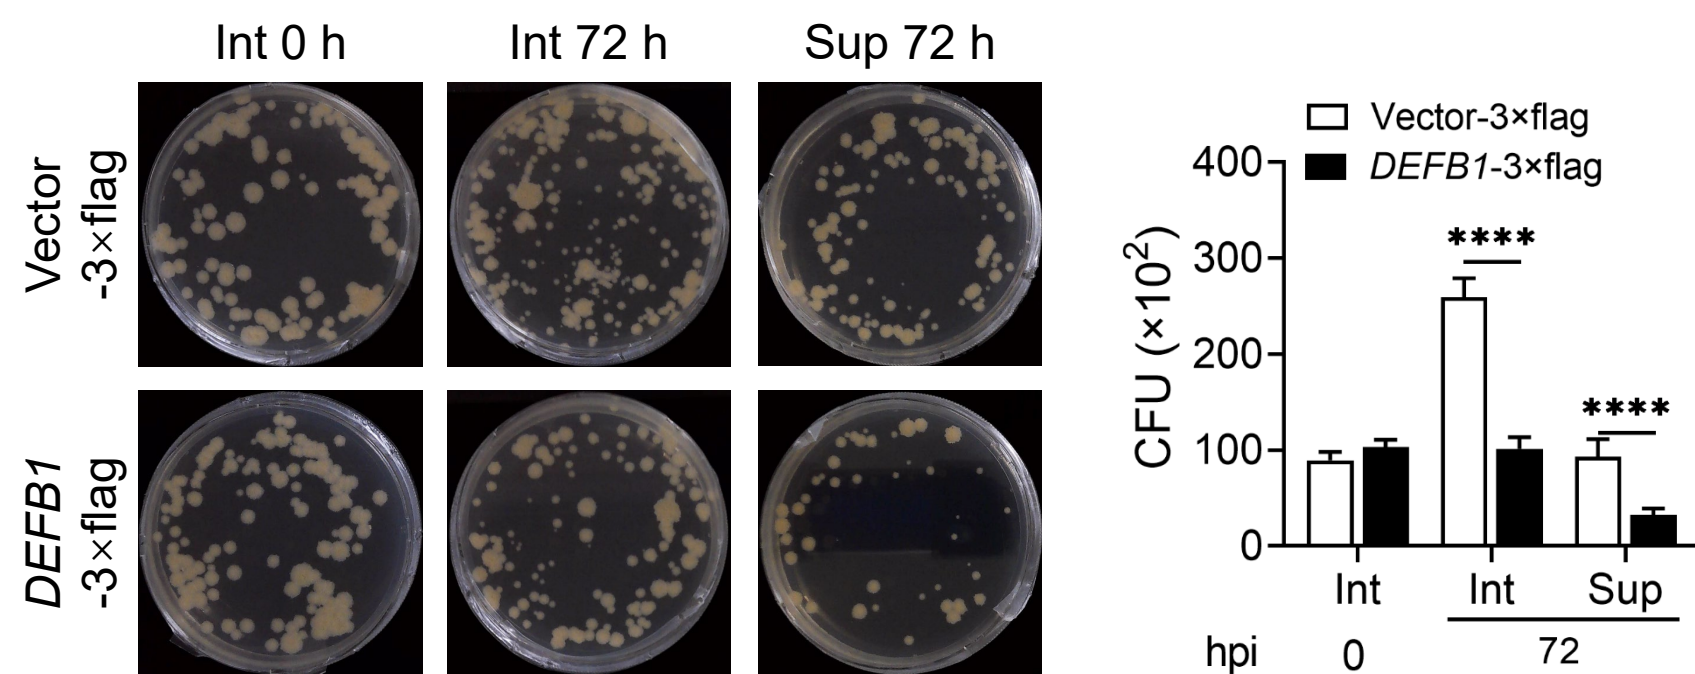

H

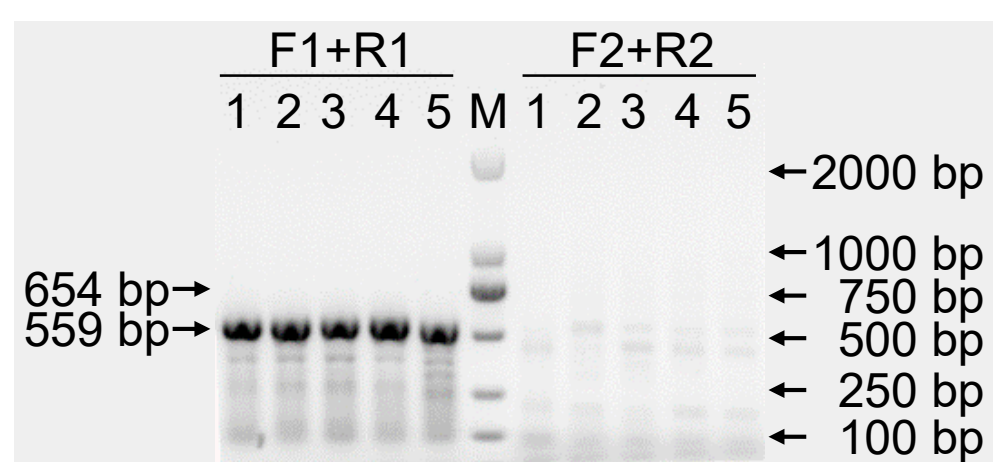

**S1 Fig.** Upregulation of hBD1 reduces the *Mycobacterium tuberculosis* (Mtb) load in Type II alveolar epithelial cells (AEC-II) cells. (A) The volcano plot for visualizing differentially expressed genes in the whole lung tissues between patients infected with tuberculosis (PTM) and uninfected individuals (HC) from GEO (GSE114911 dataset) [27] identified according to the criteria of  $\log_2$  fold change  $> 0.5$  and  $P$ -value  $< 0.05$ . (B) qPCR analysis of *DEFB1* expression in BEAS-2B cells infected with H37Rv at multiplicity of infection (MOI) = 5 for 96 h. (C-D) qPCR and western blot analysis of hBD1 expression in A549 cells (C) and BEAS-2B cells (D) infected with LV-*DEFB1*- $3 \times$  flag. (E) colony forming unit (CFU) assays of intracellular (Int) and extracellular (Sup) bacterial loads in BEAS-2B cells overexpressing *DEFB1* and infected with H37Rv at MOI = 10 after 72 h. (F) Sequencing analysis of *DEFB1* gene knockout in A549 cells using CRISPR-Cas9. (G) qPCR analysis of *DEFB1* expression in *DEFB1*<sup>-/-</sup> A549 cells. (H) The genotyping of C57BL/6J *Defb1*<sup>-/-</sup> mice was conducted using nucleic acid electrophoresis. Data are presented as mean  $\pm$  SD and are representative of at least three experiments with similar observations. Simple  $t$ -tests and ANOVA were used for comparisons involving two and three or more variables, respectively. \* $P < 0.05$ ; \*\* $P < 0.01$ ; \*\*\* $P < 0.001$ ; \*\*\*\* $P < 0.0001$ .

S2 Fig.

A

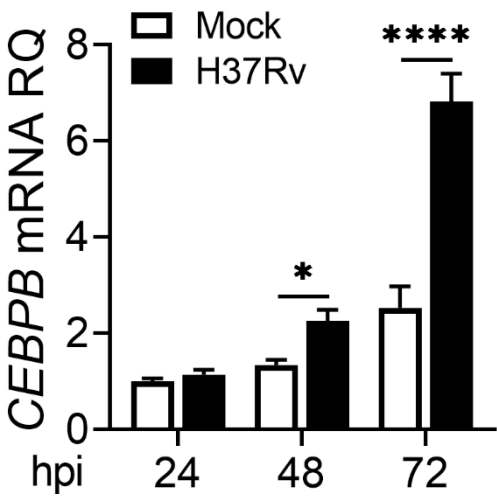

B

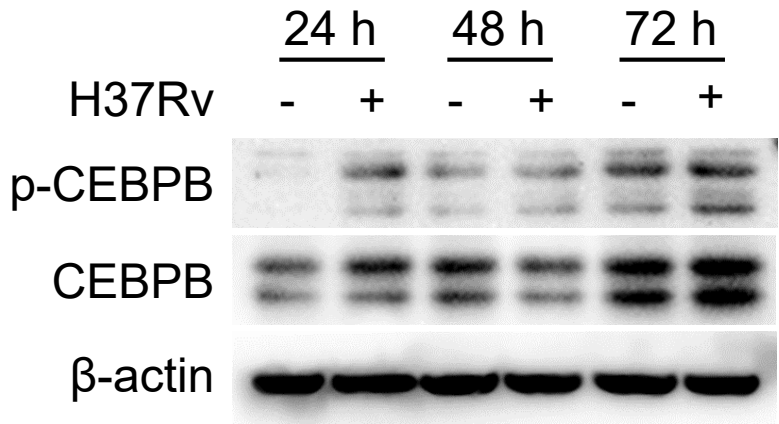

C

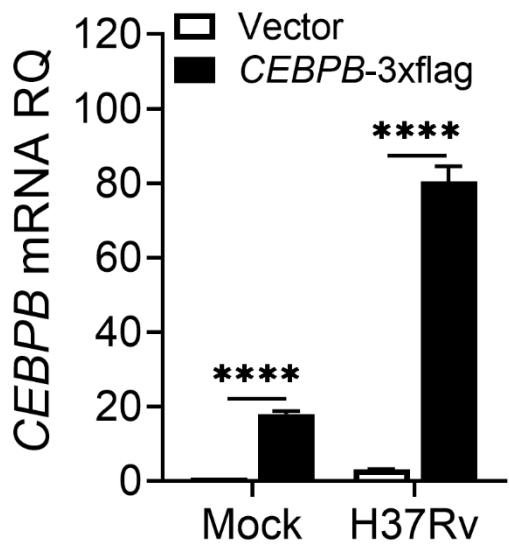

D

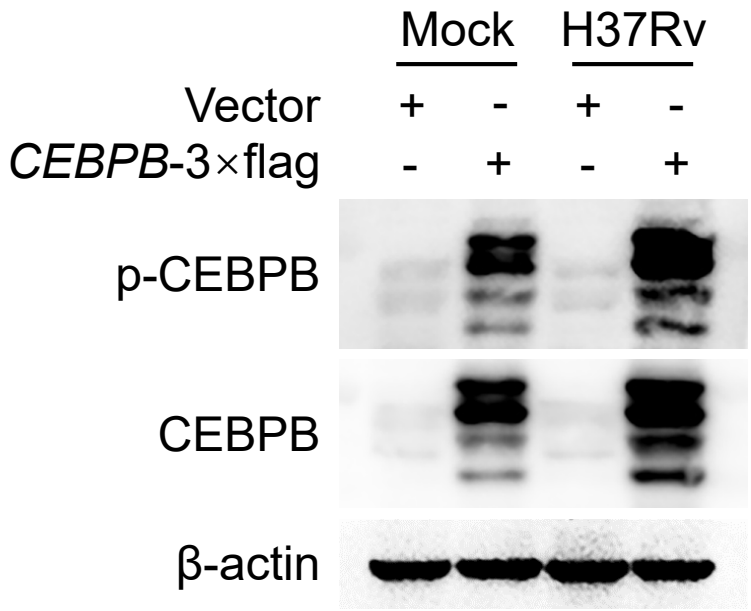

F

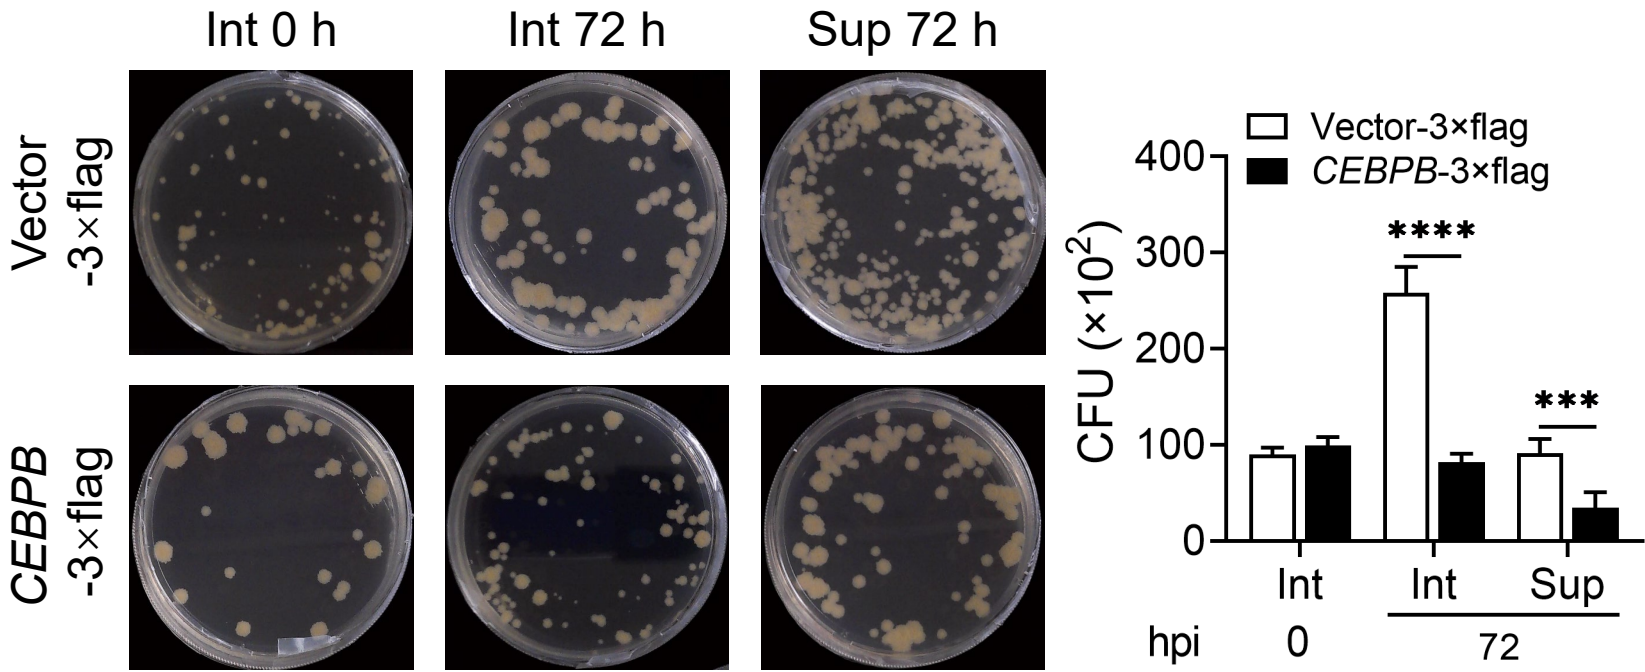

E

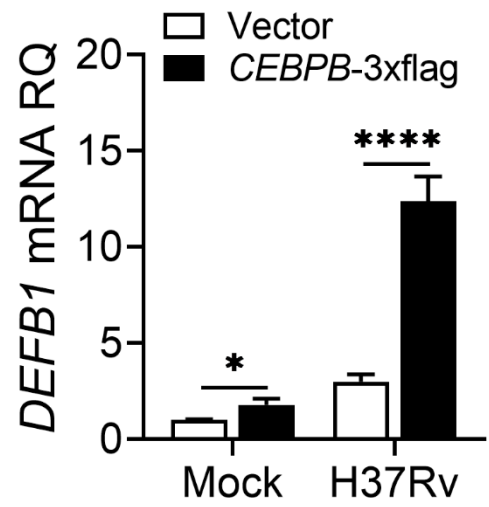

G

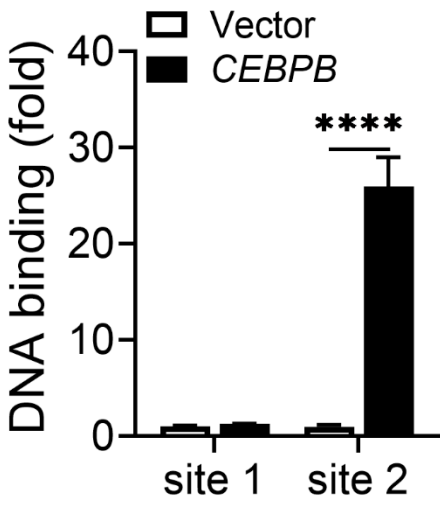

H

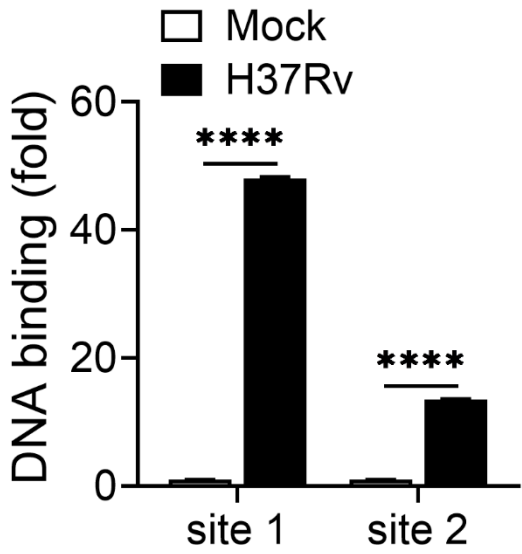

I

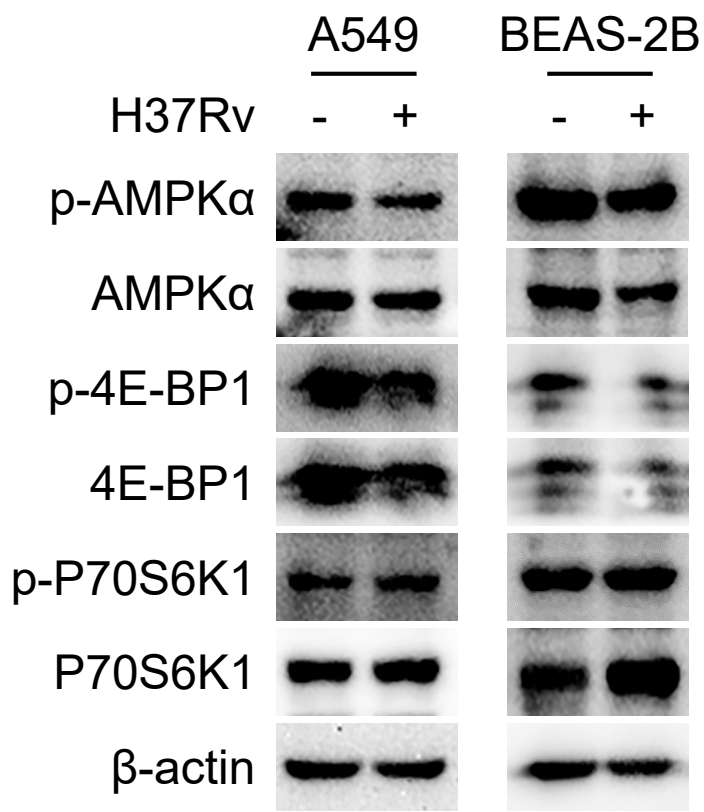

J

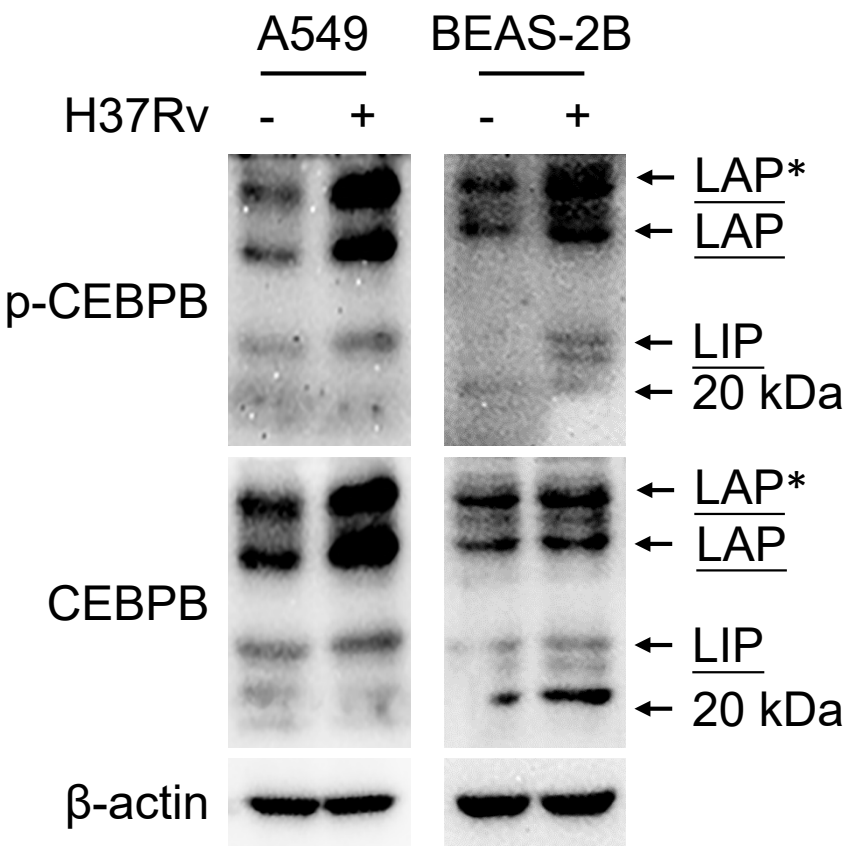



**S2 Fig.** CEBPB directly regulates *DEFB1* expression, independent of its truncated isoforms. (A-B) qPCR and western blot analysis of CEBPB mRNA (A) and protein (B) expression in BEAS-2B cells infected with H37Rv at an MOI = 5 for 72 h. (C-E) qPCR and western blot analysis of CEBPB (C-D) and *DEFB1* (E) expression in BEAS-2B cells overexpressed with CEBPB. (F) CFU assays of intracellular (Int) and extracellular (Sup) H37Rv load in BEAS-2B cells overexpressing CEBPB. (G) Chromatin immunoprecipitation (ChIP) assays of CEBPB binding to the different regions of *DEFB1* promoter in BEAS-2B cells with CEBPB overexpression. (H) ChIP assay of CEBPB binding to the different regions of *DEFB1* promoter in BEAS-2B cells infected with H37Rv at MOI = 5 for 72 h. (I) Western blot analysis of activation of AMPK and mTOR pathways in A549 and BEAS-2B cells infected with H37Rv for 72 h. (J) Western blot analysis of CEBPB phosphorylation and its truncated isoforms in A549 and BEAS-2B cells infected with H37Rv for 72 h. Data are presented as mean  $\pm$  SD and are representative of at least three experiments with similar observations. ANOVA was used for comparison involving three or more variables. \* $P < 0.05$ ; \*\* $P < 0.01$ ; \*\*\* $P < 0.001$ ; \*\*\*\* $P < 0.0001$ .

S3 Fig.

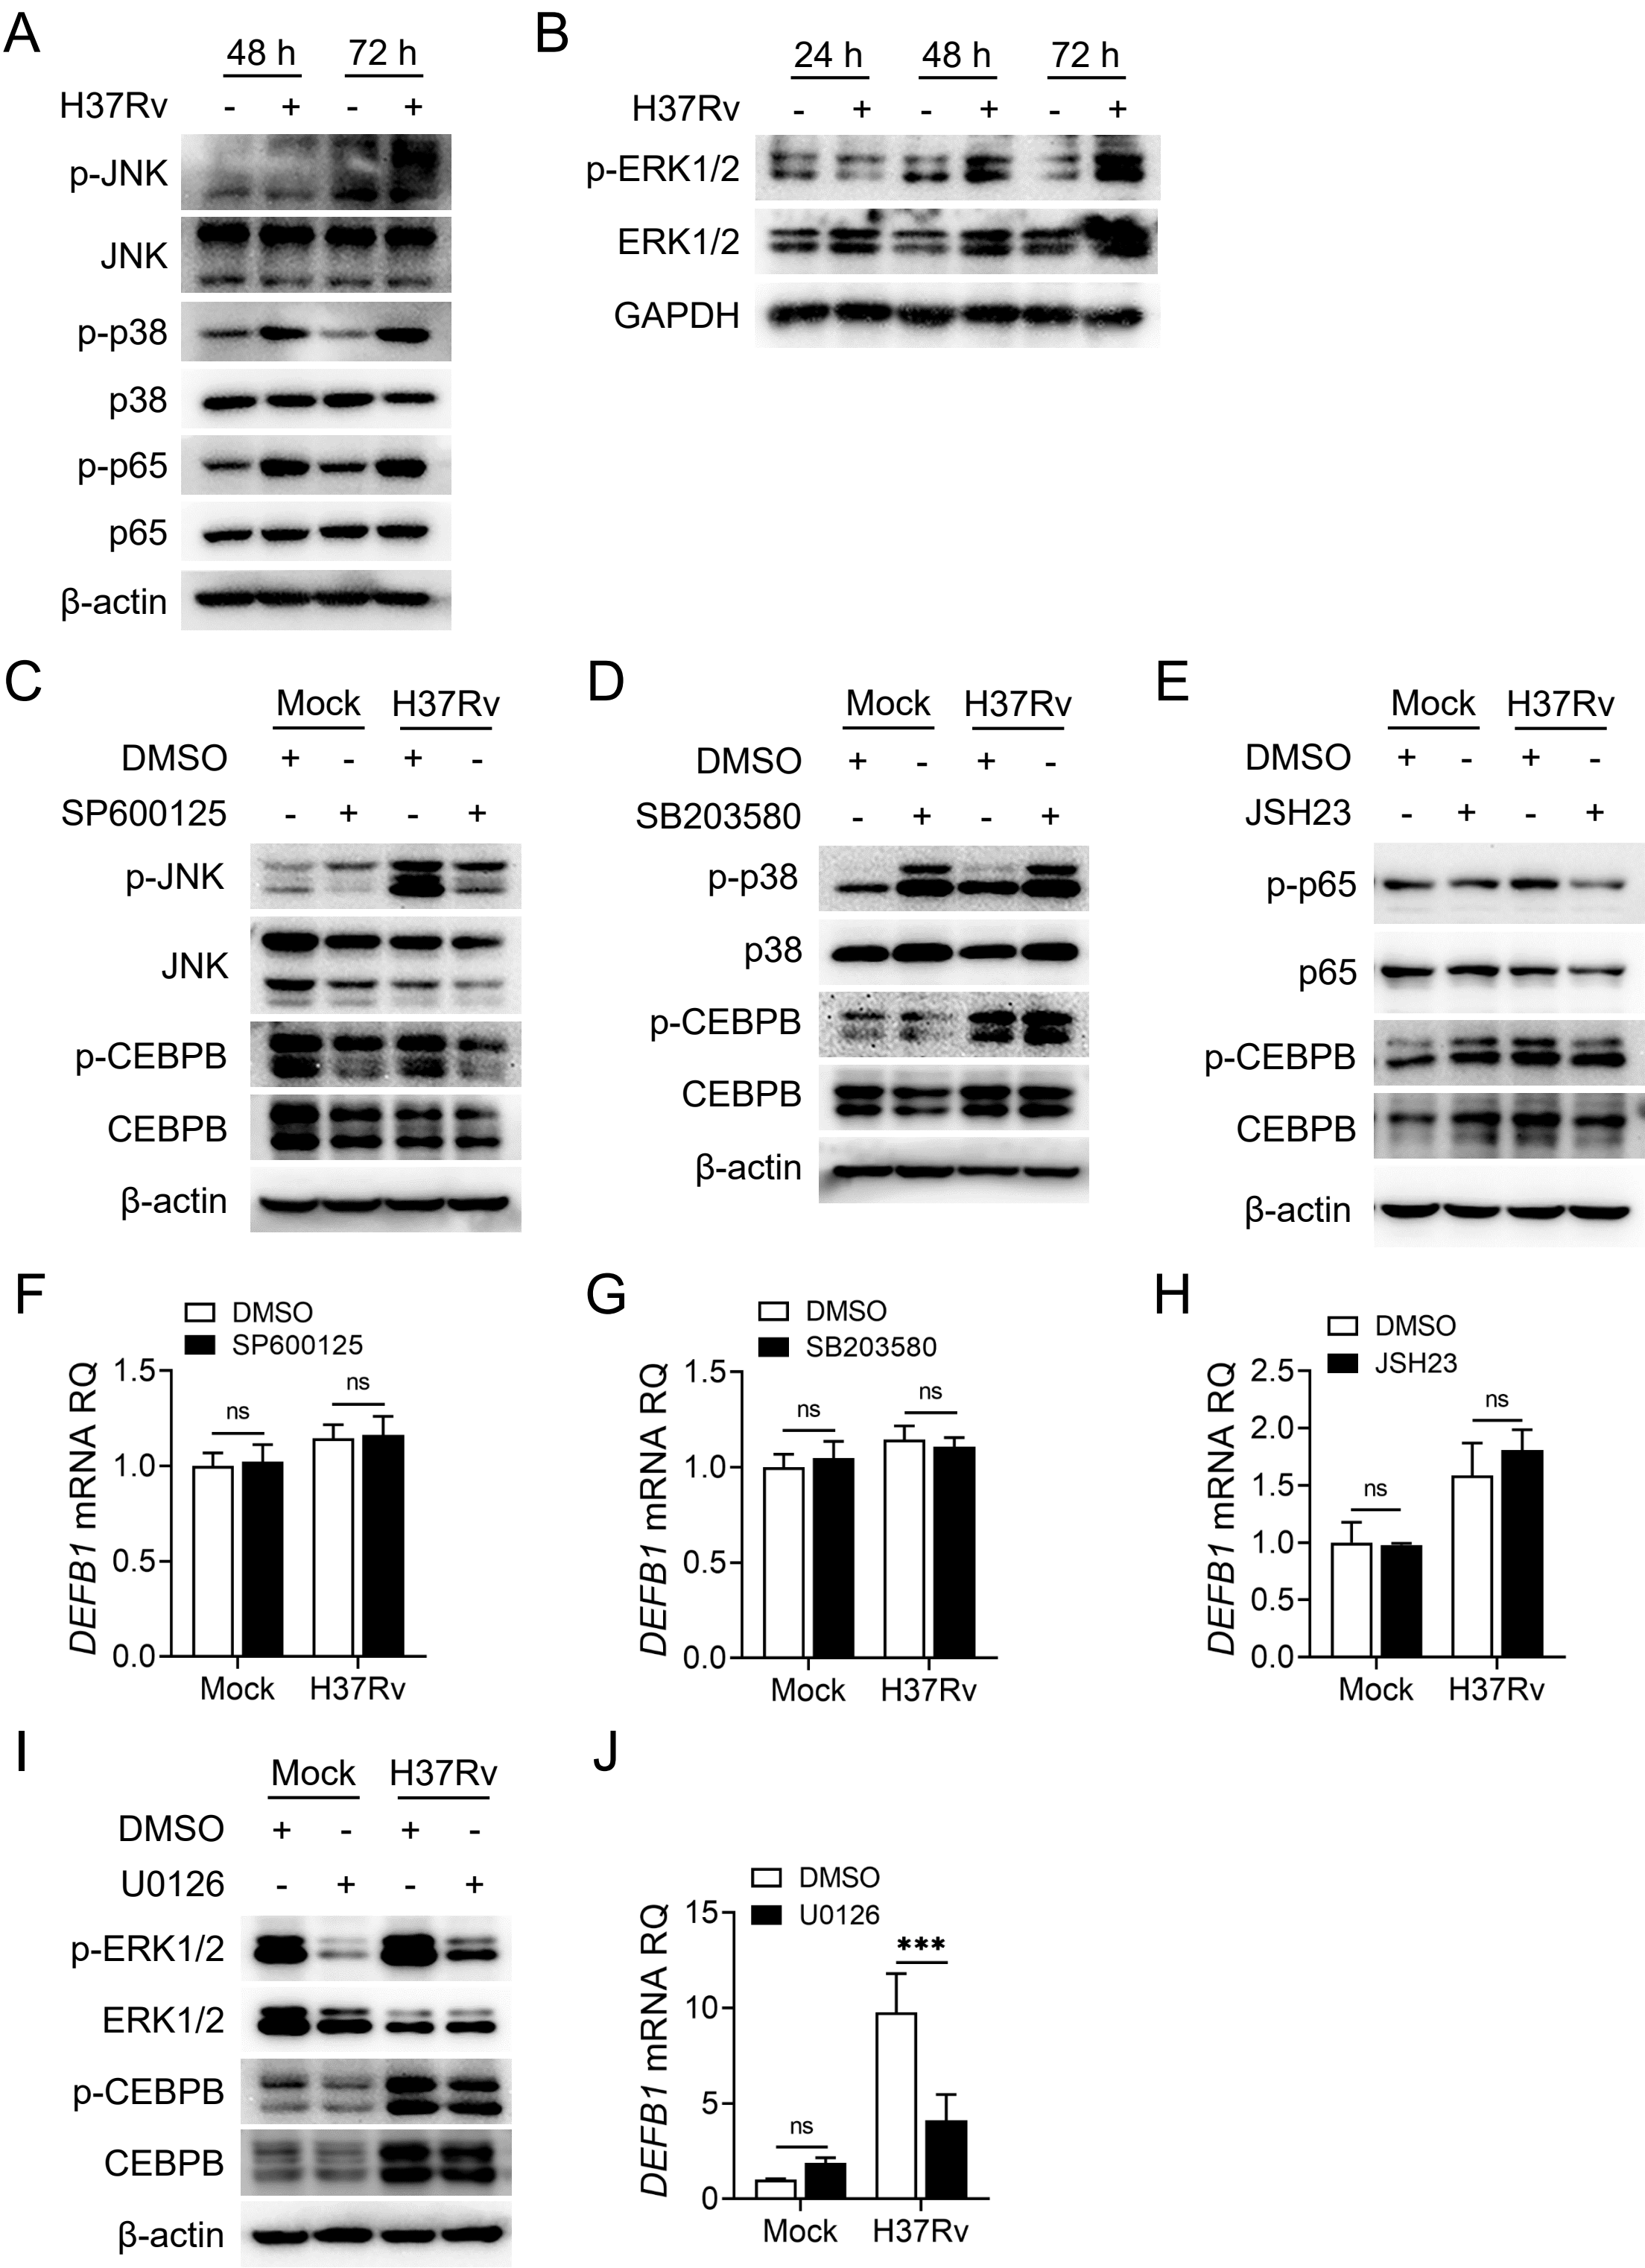

**S3 Fig.** Screening of signaling pathways regulating CEBPB phosphorylation and DEFB1 expression in AEC-II cells. (A) Western blot analysis of activation of JNK, p38 and p65 in A549 cells infected with H37Rv at MOI = 5 for 72 h. (B) Western blot analysis of activation of ERK1/2 in BEAS-2B cells infected with H37Rv at MOI = 5 for 72 h. (C-E) Western blot analysis of CEBPB phosphorylation and activation of JNK (C), p38 (D) and p65 (E) in A549 cells treated with SP600125, SB203580 and JSH23, respectively, followed by H37Rv infection at MOI = 10 for 72 h. (F-H) qPCR analysis of *DEFB1* expression in A549 cells treated with SP600125 (F), SB203580 (G) and JSH23 (H), respectively, followed by H37Rv infection at MOI = 10 for 72 h. (I-J) Western blot analysis of CEBPB phosphorylation and activation of ERK1/2 (I) and qPCR analysis of *DEFB1* expression (J) in BEAS-2B cells treated with U0126 followed by H37Rv infection at MOI = 10 for 72 h. Data are presented as mean  $\pm$  SD and are representative of at least three experiments with similar observations. ANOVA was used for comparison involving three or more variables. \* $P < 0.05$ ; \*\* $P < 0.01$ ; \*\*\* $P < 0.001$ ; \*\*\*\* $P < 0.0001$ .
