# Supplementary material for: ERK1/2-CEBPB Axis-Regulated hBD1 Enhances Anti-Tuberculosis Capacity in Alveolar Type II Epithelial Cells
Source: MDPI journal article supplement (doi:10.3390/ijms25042408), 2024-02-18
Supplement: s1 [file s1]

**Supplementary Table 1. Patient information**

| Group            | No. | Gender | Age |
|------------------|-----|--------|-----|
| Healthy controls | 1   | Male   | 22  |
|                  | 2   | Female | 73  |
|                  | 3   | Female | 24  |
|                  | 4   | Male   | 15  |
|                  | 5   | Female | 22  |
|                  | 6   | Female | 15  |
|                  | 7   | Female | 38  |
|                  | 8   | Male   | 30  |
|                  | 9   | Male   | 21  |
|                  | 10  | Female | 16  |
|                  | 11  | Female | 23  |
|                  | 12  | Female | 27  |
|                  | 13  | Male   | 23  |
|                  | 14  | Male   | 20  |
|                  | 15  | Male   | 43  |
|                  | 16  | Male   | 22  |
|                  | 17  | Female | 59  |
|                  | 18  | Male   | 29  |
|                  | 19  | Male   | 38  |
|                  | 20  | Female | 32  |
|                  | 21  | Female | 14  |
|                  | 22  | Male   | 32  |
|                  | 23  | Female | 59  |
|                  | 24  | Male   | 40  |
|                  | 25  | Female | 38  |
|                  | 26  | Female | 62  |
|                  | 27  | Female | 29  |
|                  | 28  | Male   | 16  |
|                  | 29  | Female | 28  |
|                  | 30  | Female | 27  |
|                  | 31  | Male   | 35  |
|                  | 32  | Male   | 45  |
|                  | 33  | Female | 28  |
|                  | 34  | Male   | 60  |

|                                 |    |        |    |
|---------------------------------|----|--------|----|
| Pulmonary tuberculosis patients | 1  | Male   | 59 |
|                                 | 2  | Male   | 30 |
|                                 | 3  | Female | 43 |
|                                 | 4  | Male   | 62 |
|                                 | 5  | Female | 30 |
|                                 | 6  | Female | 60 |
|                                 | 7  | Female | 19 |
|                                 | 8  | Male   | 48 |
|                                 | 9  | Female | 30 |
|                                 | 10 | Male   | 20 |
|                                 | 11 | Female | 28 |
|                                 | 12 | Female | 27 |
|                                 | 13 | Male   | 25 |
|                                 | 14 | Female | 24 |
|                                 | 15 | Male   | 21 |
|                                 | 16 | Female | 25 |
|                                 | 17 | Female | 58 |
|                                 | 18 | Female | 51 |
|                                 | 19 | Male   | 59 |
|                                 | 20 | Male   | 48 |
|                                 | 21 | Female | 25 |
|                                 | 22 | Female | 25 |
|                                 | 23 | Male   | 59 |
|                                 | 24 | Male   | 25 |
|                                 | 25 | Male   | 38 |

**Supplementary Table 2. Sequences of siRNA and primers**

| siRNA                                |                                                                                                   |                  |                    |
|--------------------------------------|---------------------------------------------------------------------------------------------------|------------------|--------------------|
| SiRNA                                | Targeting sequence                                                                                | Accession number |                    |
| sh- <i>CEBPB</i> -1                  | 5'-CAUCGACUUCAGCCCGUACCUTT-3'                                                                     | NM_005194.4      |                    |
| sh- <i>CEBPB</i> -2                  | 5'-GCCCTGAGTAATCGCTTAA-3'                                                                         |                  |                    |
| si- <i>STAT1</i> -1                  | 5'-GCAGCACAACATACGGAAA-3'                                                                         | XM_054343560.1   |                    |
| si- <i>STAT1</i> -2                  | 5'-GCTGAACTATAACTTGAAA-3'                                                                         |                  |                    |
| qPCR primers                         |                                                                                                   |                  |                    |
| Gene                                 | Primer pairs                                                                                      | Amplicon         | Accession number   |
| <i>Actin</i>                         | FP: 5'-TCAAGATCATTGCTCCTCCTGAG-3'<br>RP: 5'-ACATCTGCTGGAAGGTGGACA-3'                              | 87 bp            | NM_00110<br>1.5    |
| <i>DEFB1</i>                         | FP: 5'-GGTAACTTTCTCACAGGCCTTGG-3'<br>RP: 5'-TCCCTCTGTAACAGGTGCCTTG-3'                             | 124 bp           | NM_00521<br>8.4    |
| <i>CEBPB</i>                         | FP: 5'-AGAAGACCGTGGACAAGCACAG-3'<br>RP: 5'-CTCCAGGACCTTGTGCTGCGT-3'                               | 125 bp           | NM_00519<br>4.4    |
| <i>STAT1</i>                         | FP: 5'-ATGGCAGTCTGGCGGCTGAATT-3'<br>RP: 5'-CCAAACCAGGCTGGCACAATTG-3'                              | 144 bp           | XM_05434<br>3560.1 |
| CHIP site 1                          | FP: 5'-CCACTGCGCCCTGACC-3'<br>RP: 5'-TGGGGAGGCTTCCAGGTTAT-3'                                      | 220 bp           | NC_000008<br>.11   |
| CHIP site 2                          | FP: 5'-TGCTCAGGGCAAATGACACC-3'<br>RP: 5'-ACCCAGGATTTTCAGGAACTGG-3'                                | 193 bp           | NC_000008<br>.11   |
| PCR primers for human identification |                                                                                                   |                  |                    |
| Gene                                 | Primer pairs                                                                                      | Amplicon         |                    |
| <i>Defb1</i> -sg-F1                  | 5'-TGGGCCTTCATAGGTAACCTGTC-3'                                                                     | Wt: none         |                    |
| <i>Defb1</i> -sg-R1                  | 5'-AAACTACTACATCATGTGTGCCATC-3'                                                                   | KO: 559 bp       |                    |
| <i>Defb1</i> -wt-F2                  | 5'-TGGGCCTTCATAGGTAACCTGTC-3'                                                                     | Wt: 654 bp       |                    |
| <i>Defb1</i> -wt-R2                  | 5'-GAATGGCTCAATACATTTGACGCTC-3'                                                                   | KO: none         |                    |
| PCR primers for plasmid construction |                                                                                                   |                  |                    |
| Gene                                 | Primer pairs                                                                                      | Amplicon         |                    |
| <i>DEFB1</i>                         | FP: 5'-CGGGATCCATGAGAACTTCCTACCTTCT-3'<br>RP: 5'-CGTCTAGACTTGCAGCACTTGGCCT-3'                     | 220 bp           |                    |
| <i>CEBPB</i>                         | FP: 5'-CGGAATTCATGCAACGCCTGGTGG-3'<br>RP: 5'-CGGGATCCGCACTGGCCGGAGGA-3'                           | 1051 bp          |                    |
| <i>STAT1</i>                         | FP: 5'-CGGCTAGCGCCACCATGTCTCAGTGGTACGAACTTC-3'<br>RP: 5'-CGGGATCCCGTACTGTGTTTCATCATACTGTCTGAAT-3' | 2274 bp          |                    |
| <i>DEFB1</i> -promoter FL            | FP: 5'-CGGGTACCACCACACCCAGCTAATTTTTG-3'<br>RP: 5'-CCAAGCTTAAGTAAGCAGAGAGTAAACAG-3'                | 2201 bp          |                    |
| <i>DEFB1</i> -promoter Δ1            | FP: 5'-CGGGTACCAGCTTGAAGGTGCCTGAGATATT-3'<br>RP: 5'-CCAAGCTTAAGTAAGCAGAGAGTAAACAG-3'              | 1928 bp          |                    |
| <i>DEFB1</i> -promoter Δ2            | FP: 5'-CGGGTACCAATAACCTGGAAGCCTCCCC-3'<br>RP: 5'-CCAAGCTTAAGTAAGCAGAGAGTAAACAG-3'                 | 1869 bp          |                    |

|                                                        |                                                                                     |                 |
|--------------------------------------------------------|-------------------------------------------------------------------------------------|-----------------|
| <i>DEFB1</i> -<br>promoter Δ3                          | FP: 5'-CGGGTACCAATAACCTGGAAGCCTCCCC-3'<br>5'-CCAAGCTTAATCGCTAACCCCTGGTGTC-3'        | 1651 bp         |
| <i>DEFB1</i> -<br>promoter Δ4                          | FP: 5'-CGGGTACCACCACACCCAGCTAATTTTGG-3'<br>RP: 5'-CCAAGCTTAATCGCTAACCCCTGGTGTC-3'   | 1983 bp         |
| <i>DEFB1</i> -<br>promoter Δ5                          | FP: 5'-CGGGTACCAGCTTGAAGGTGCCTGAGATATT-3'<br>RP: 5'-CCAAGCTTAATCGCTAACCCCTGGTGTC-3' | 1710 bp         |
| <b>gDNA for <i>DEFB1</i> knockout with CRISPR-Cas9</b> |                                                                                     |                 |
| <b>Gene</b>                                            | <b>gDNA</b>                                                                         | <b>Amplicon</b> |
| <i>DEFB1</i> -sg-<br>top                               | 5'-CACCGAAGTTCTCATGGCGACTGGC-3'                                                     | 21 bp           |
| <i>DEFB1</i> -sg-<br>bottom                            | 5'-AAACGCCAGTCGCCATGAGAACTTC-3'                                                     |                 |
